# Supplementary material for: Polarization engineering of porous organic polymers for superior photocatalytic synthesis of disulfides and CO2reduction
Source: Royal Society of Chemistry journal article supplement (doi:10.1039/d2ta06941e), 2022-01-01
Supplement: d2ta06941e1.pdf [file d2ta06941e1.pdf]

## **Polarization engineering of porous organic polymer for superior photocatalytic synthesis of disulfide and CO<sub>2</sub> reduction**

Xiaoyan Huang,<sup>a</sup> Yanling Lu,<sup>a</sup> Guojiang Mao,<sup>b</sup> Shiheng Yin,<sup>c</sup> Bei long,<sup>a</sup> Guo-Jun Deng,<sup>a</sup> Atif Ali<sup>d</sup> and Ting Song<sup>a\*</sup>

<sup>a</sup> Key Laboratory for Green Organic Synthesis and Application of Hunan Province, Key Laboratory of Environmentally Friendly Chemistry and Application of Ministry of Education, College of Chemistry, Xiangtan University, Xiangtan 411105, P. R. China.

<sup>b</sup> School of Chemistry and Chemical Engineering, Henan Normal University, Xinxiang, 453007, P. R. China

<sup>c</sup> Analytical and Testing Center, South China University of Technology, Guangzhou 510640, P. R. China.

<sup>d</sup> Department of Chemistry and State Key Laboratory of Synthetic Chemistry, The University of Hong Kong, Pokfulam Road, Hong Kong, P. R. China.

\*Corresponding author. E-mail: songtg@xtu.edu.cn

## **Computational methods**

The first-principles calculations based on the Density Functional Theory (DFT) were performed using the Materials Studio software with CASTEP and DMol3 model. The Perdew-Burke-Ernzerhof (PBE) exchange-correlation functional within the generalized gradient approximation (GGA) was employed to describe the exchange-correlation energy. The energy cutoff for the plane wave basis expansion was set to 600 eV. The force on each atom was set as 0.03 eV/Å for convergence criterion. Slab model was constructed in a 4×4 supercell, with a vacuum layer of 20 Å in the z direction to avoid the interaction between layers. The sampling in the Brillouin zone was set with 3×3×1 by the Monkhorst-Pack method. The van der Waals interaction was considered by using DFT-D3 method.

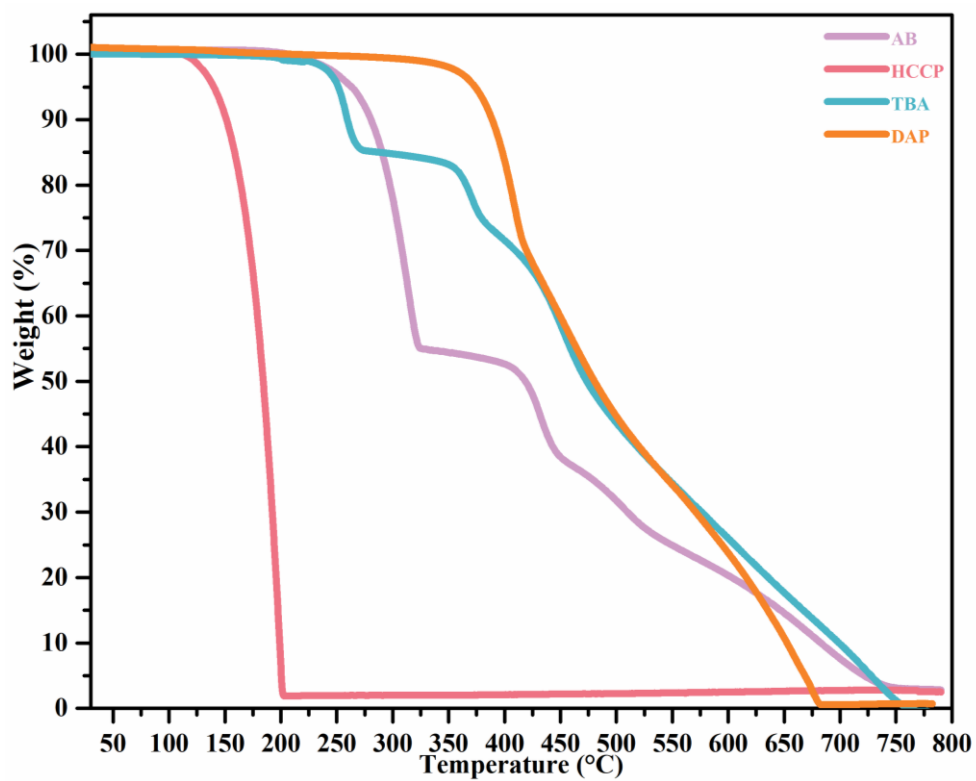

**Fig. S1.** Thermogravimetric analysis results of AB (barbituric acid), HCCP (hexachlorocyclotriphosphazene), TBA (2-thiobarbituric acid), and DAP (2-Amino-4,6-dihydroxypyrimidine).

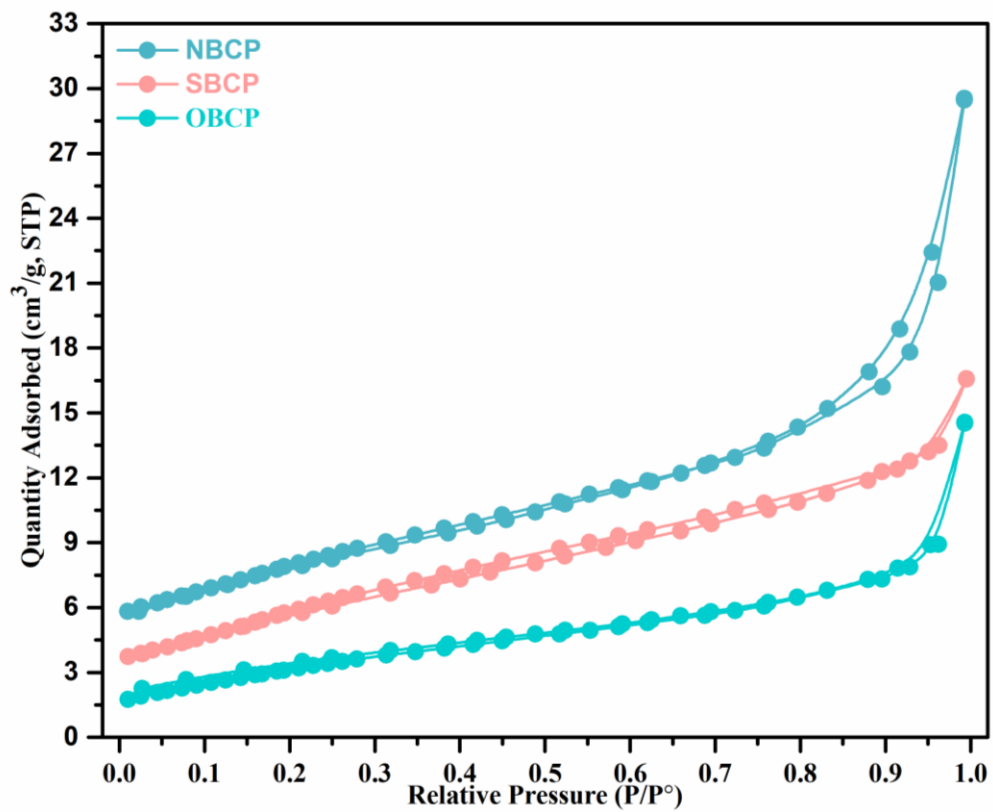

**Fig. S2.** N<sub>2</sub> adsorption-desorption isotherm of NBCP, SBP and OBCP.

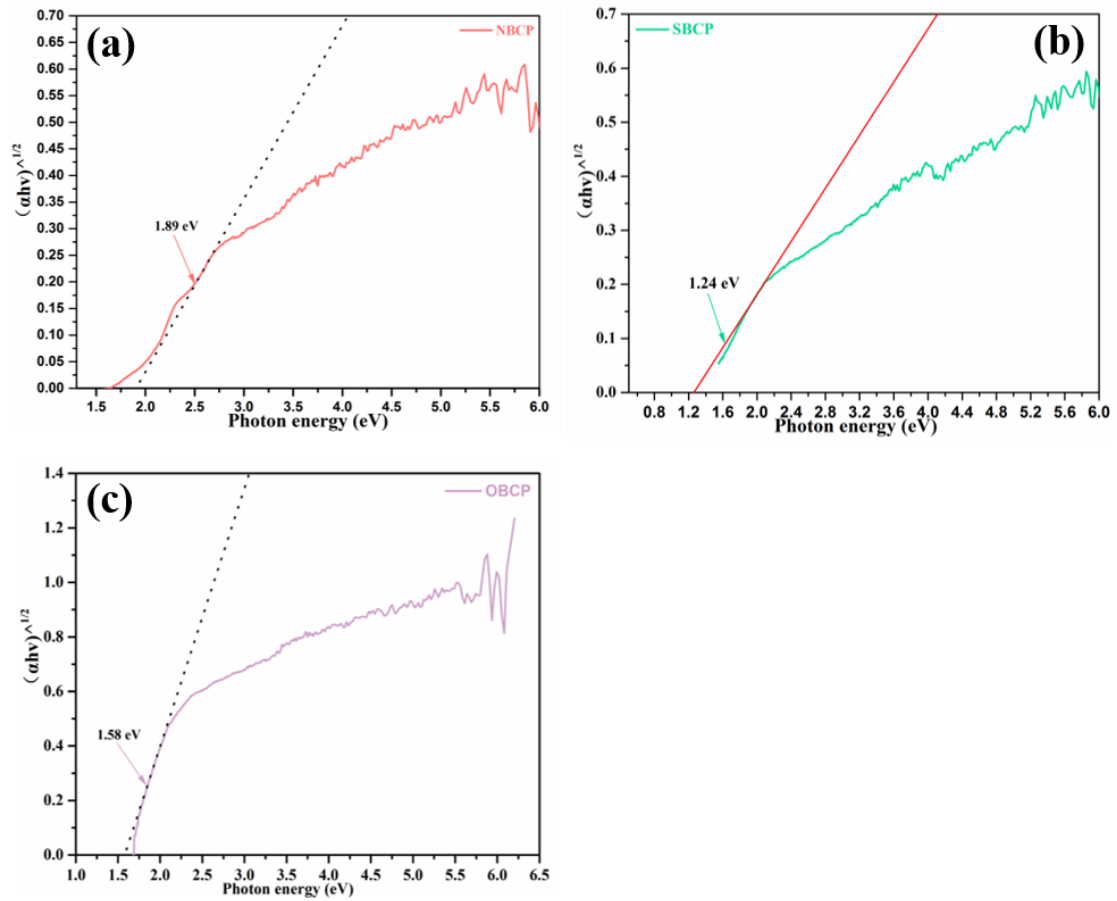

**Fig. S3.** UV–vis diffuse reflectance spectra measured from samples as indicated by the legends. Plot of  $(\alpha h\nu)^{1/2}$  vs  $h\nu$ .

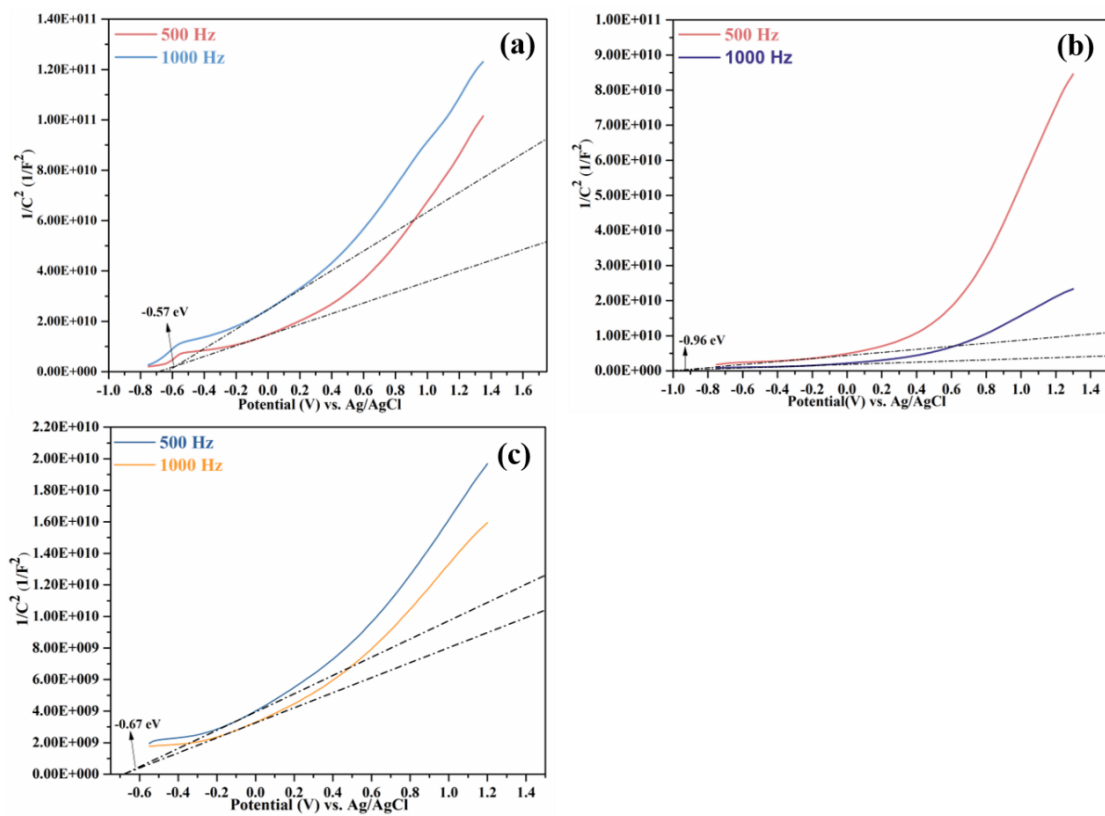

**Fig. S4.** Mott-Schottky plots of (a) NBCP, (b) OBCP and (c) SBCP.

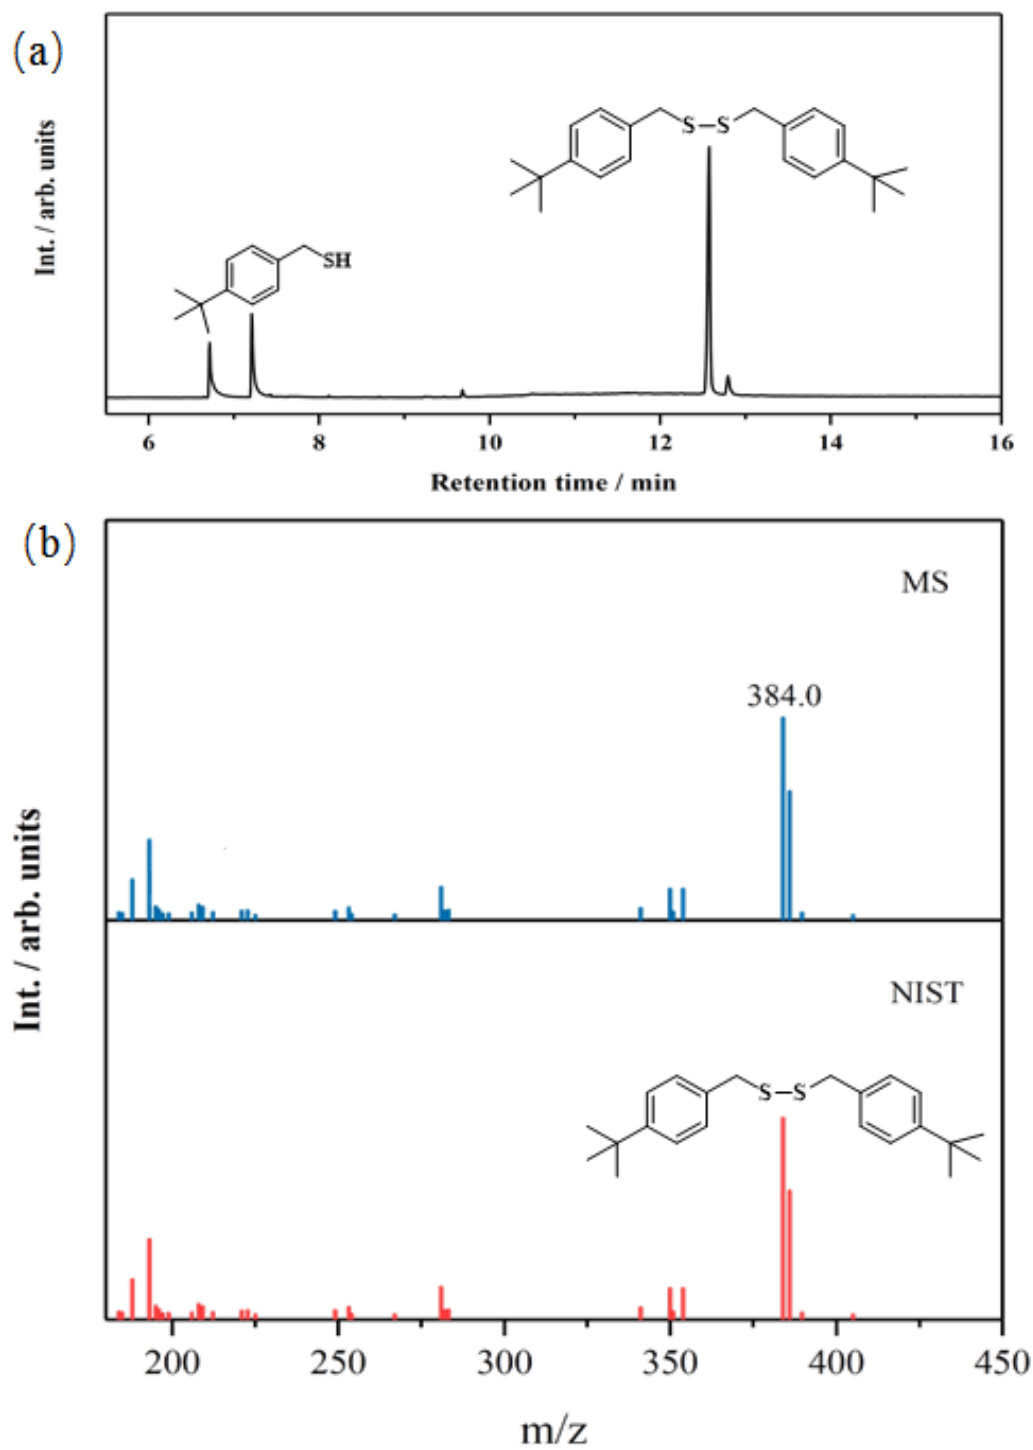

**Fig. S5.** (a) GC spectrum of 1,2-bis(4-(tert-butyl)benzyl)disulfane. (b) MS spectrum from GC-MS and the NIST database (below).

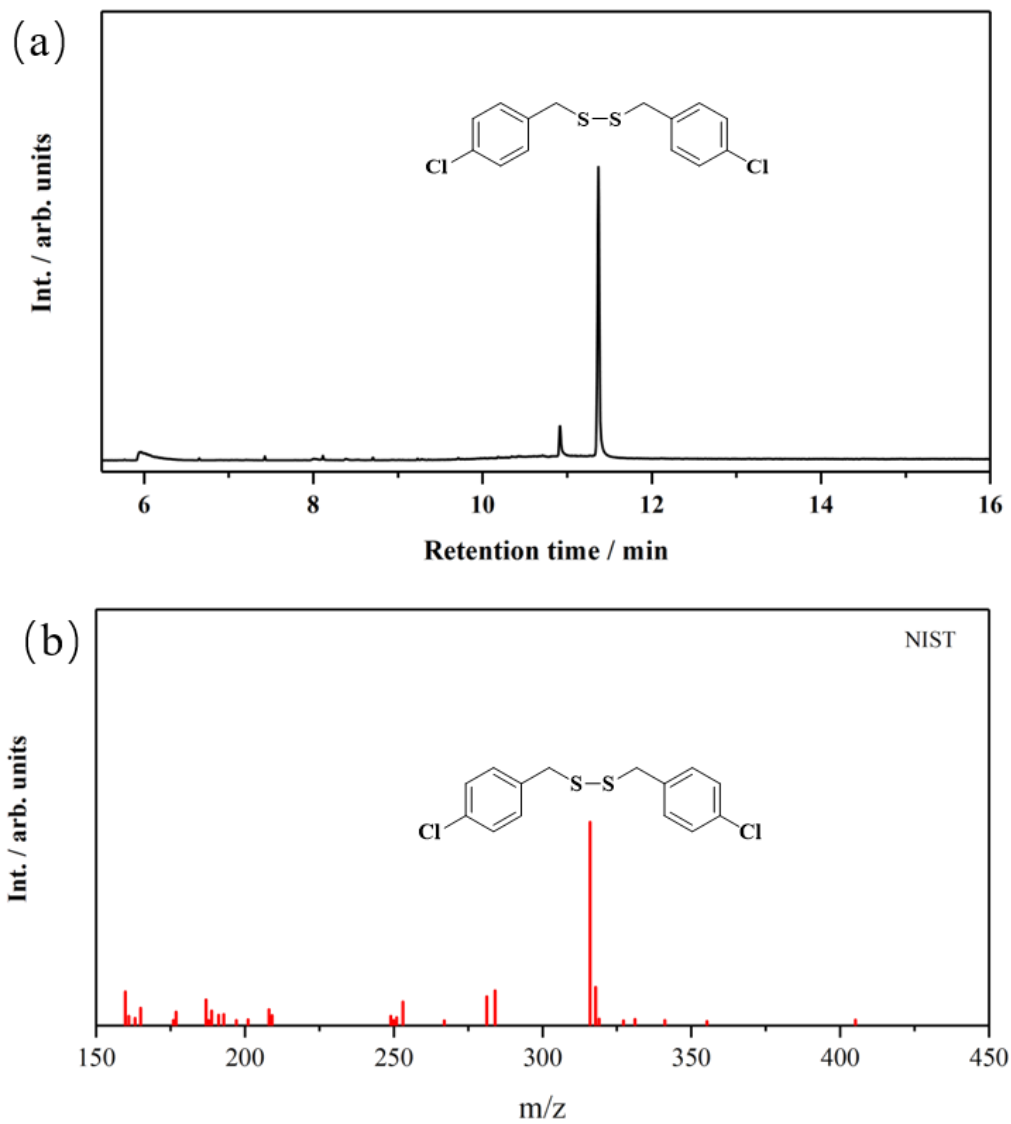

**Fig. S6.** (a) GC spectrum of 1,2-bis(4-chlorobenzyl)disulfane. (b) MS spectrum from GC-MS and the NIST database (below).



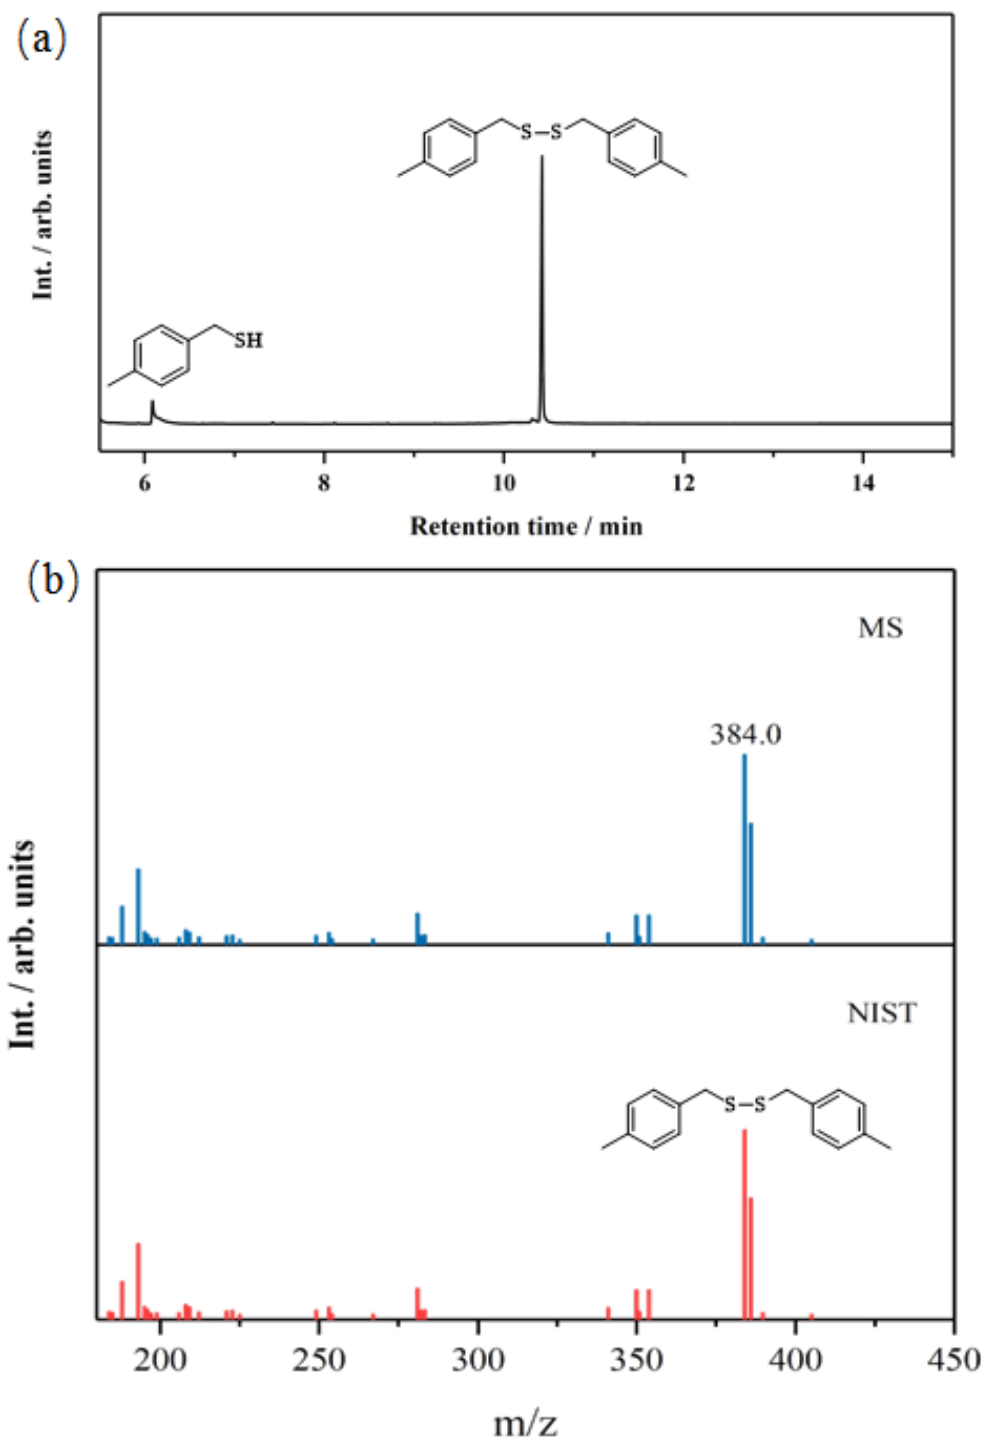

**Fig. S7.** (a) GC spectrum of 1,2-bis(4-methylbenzyl)disulfane. (b) MS spectrum from GC-MS and the NIST database (below).

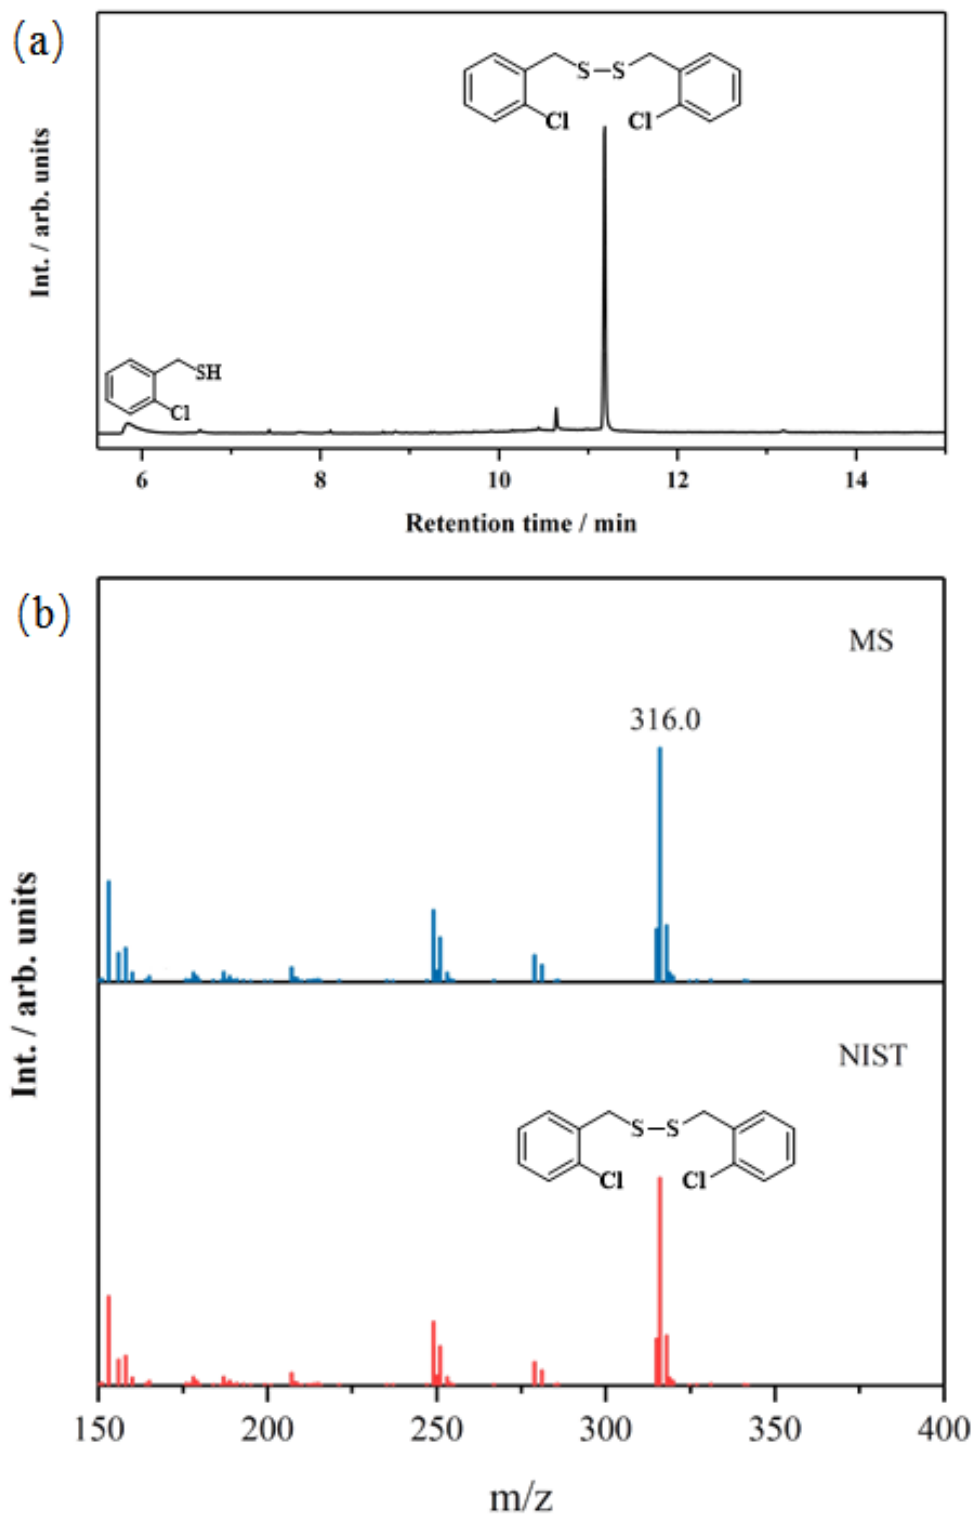

**Fig. S8.** (a)GC spectrum of 1,2-bis(2-chlorophenyl)disulfane. (b) MS spectrum from GC-MS and the NIST database (below).

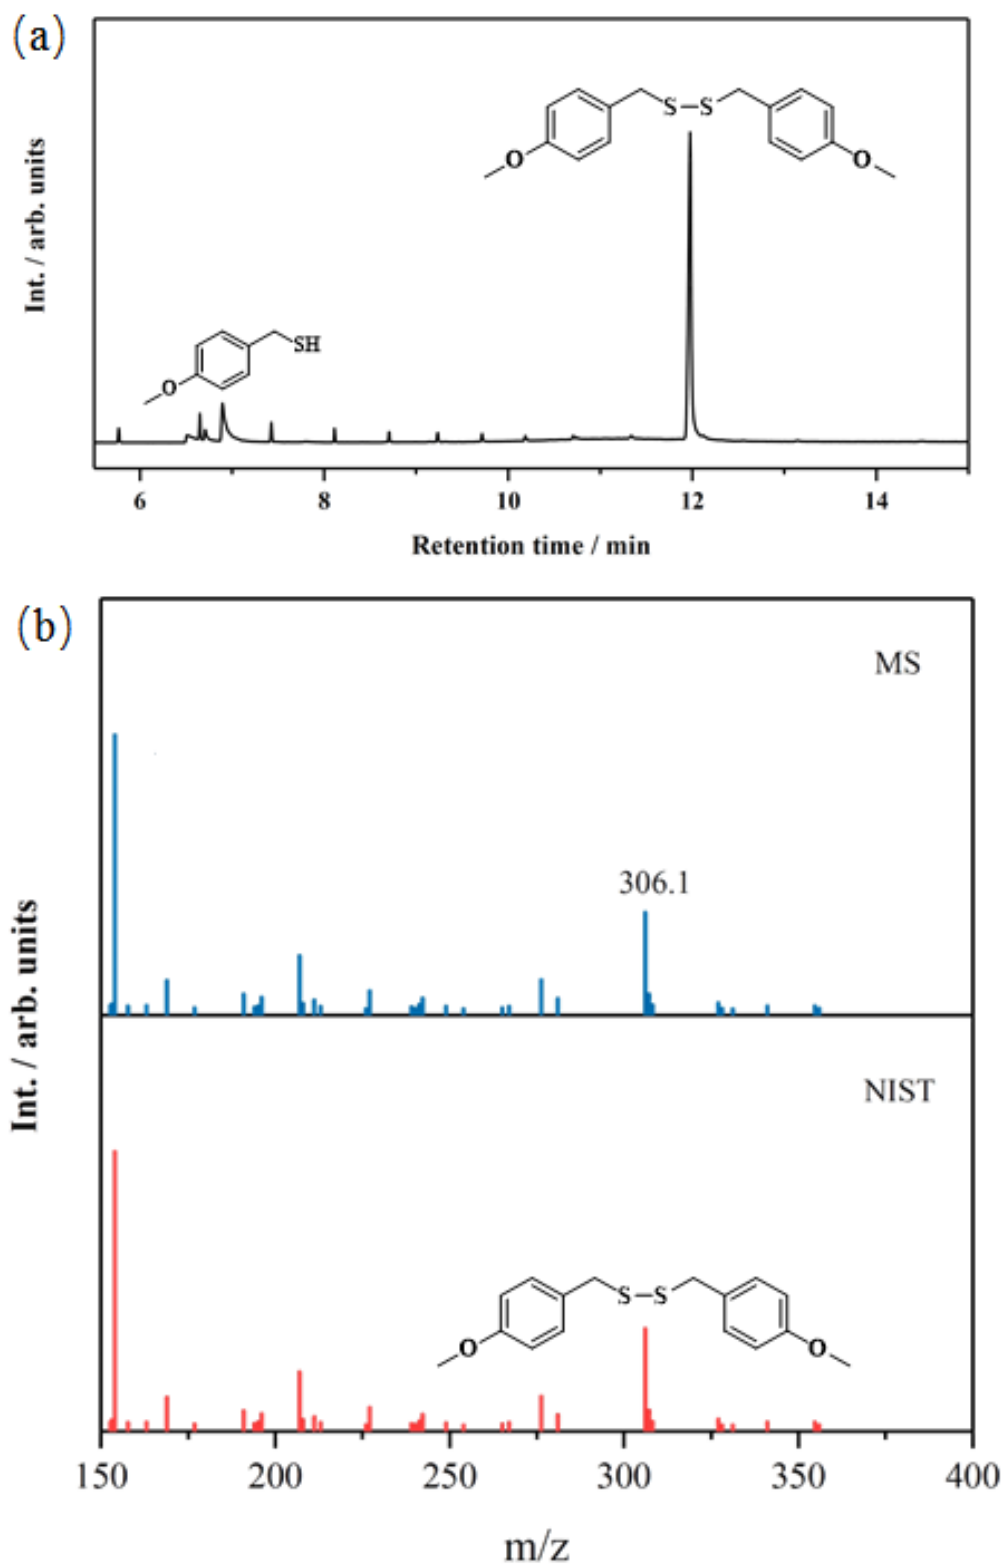

**Fig. S9.** (a) GC spectrum of 1,2-bis(4-methoxybenzyl)disulfane. (b) MS spectrum from GC-MS and the NIST database (below).

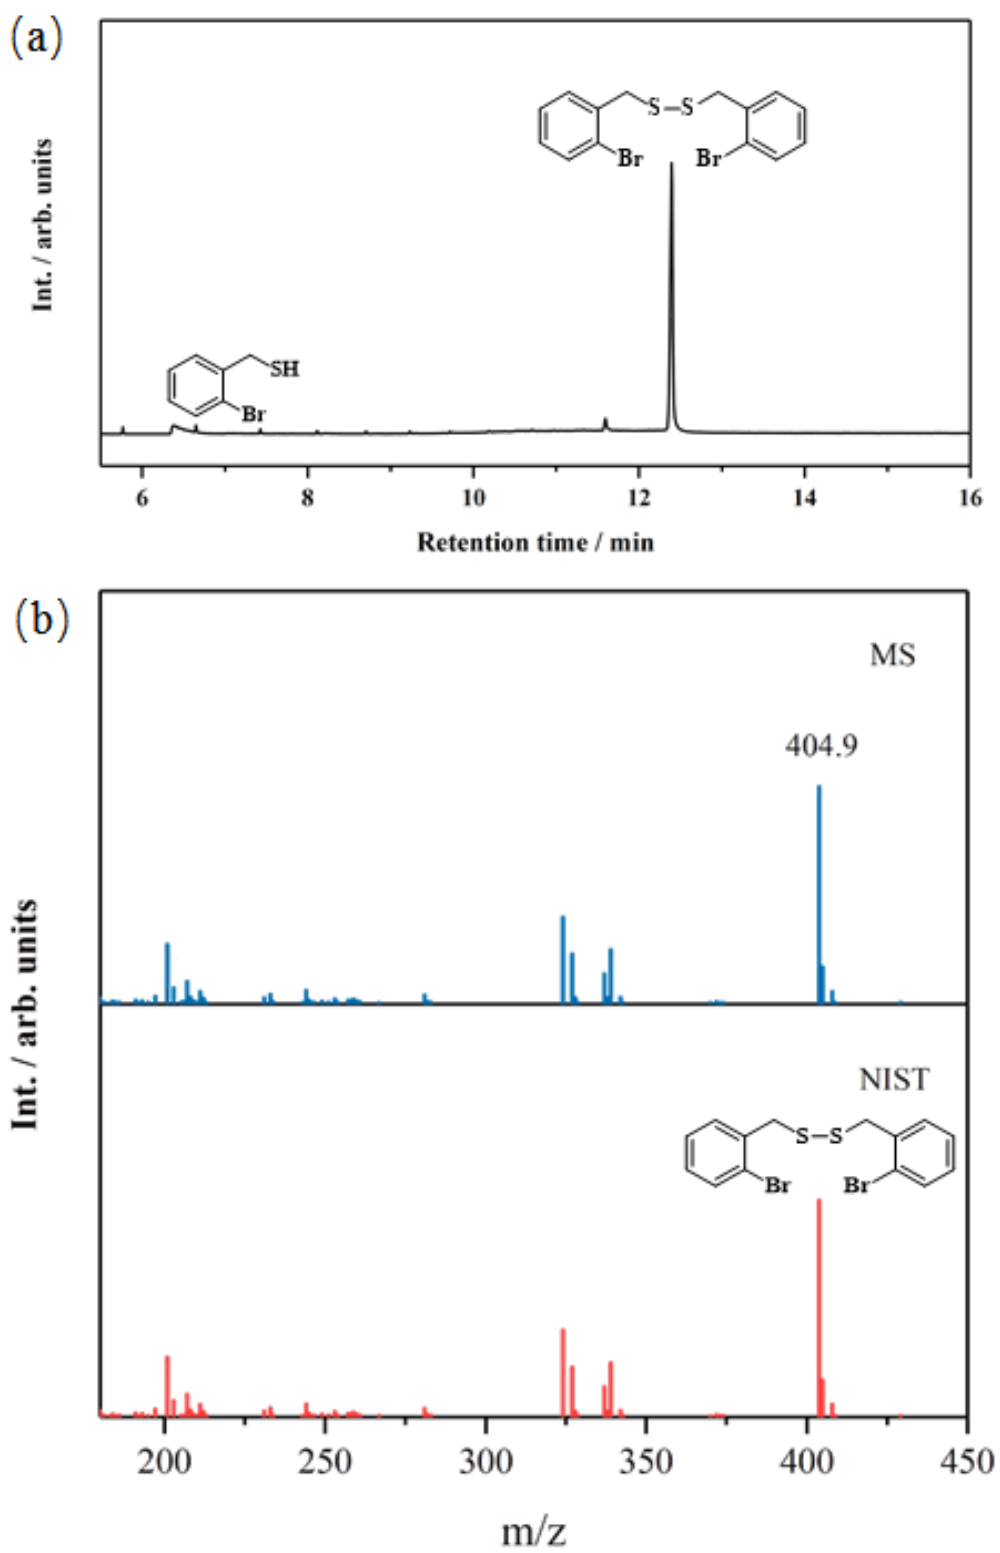

**Fig. S10.** (a) GC spectrum of 1,2-bis(2-bromobenzyl)disulfane. (b) MS spectrum from GC-MS and the NIST database (below).

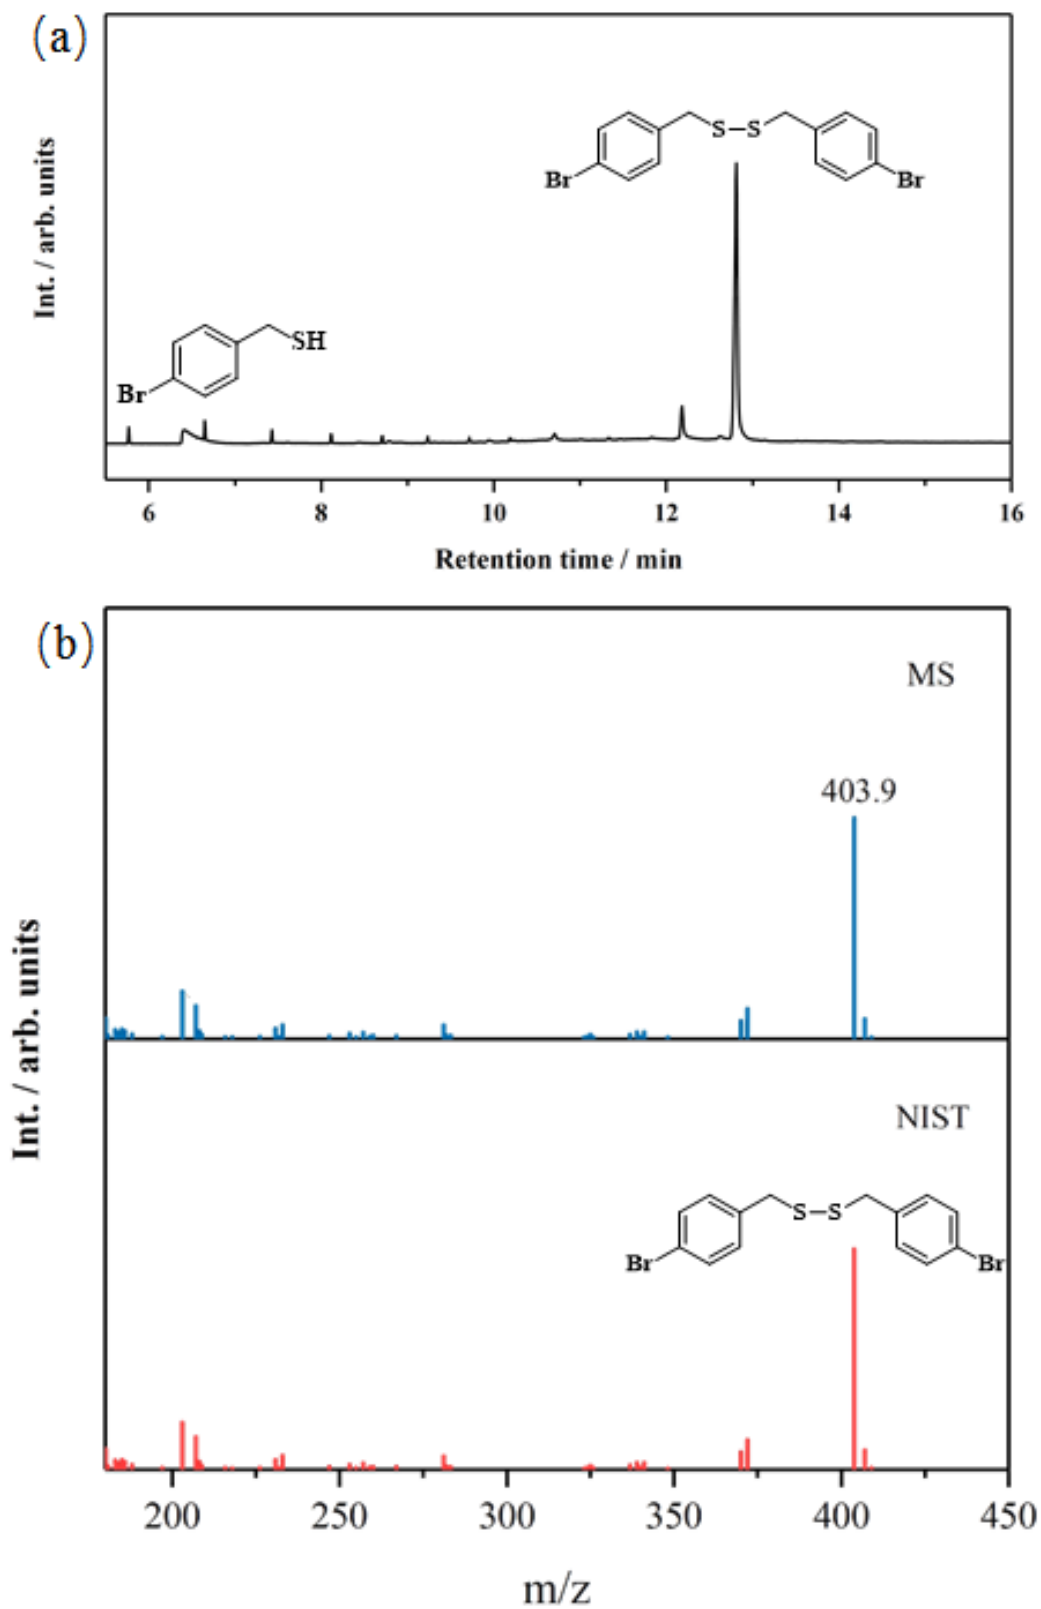

**Fig. S11.** (a) GC spectrum of 1,2-bis(4-bromobenzyl)disulfane. (b) MS spectrum from GC-MS and the NIST database (below).

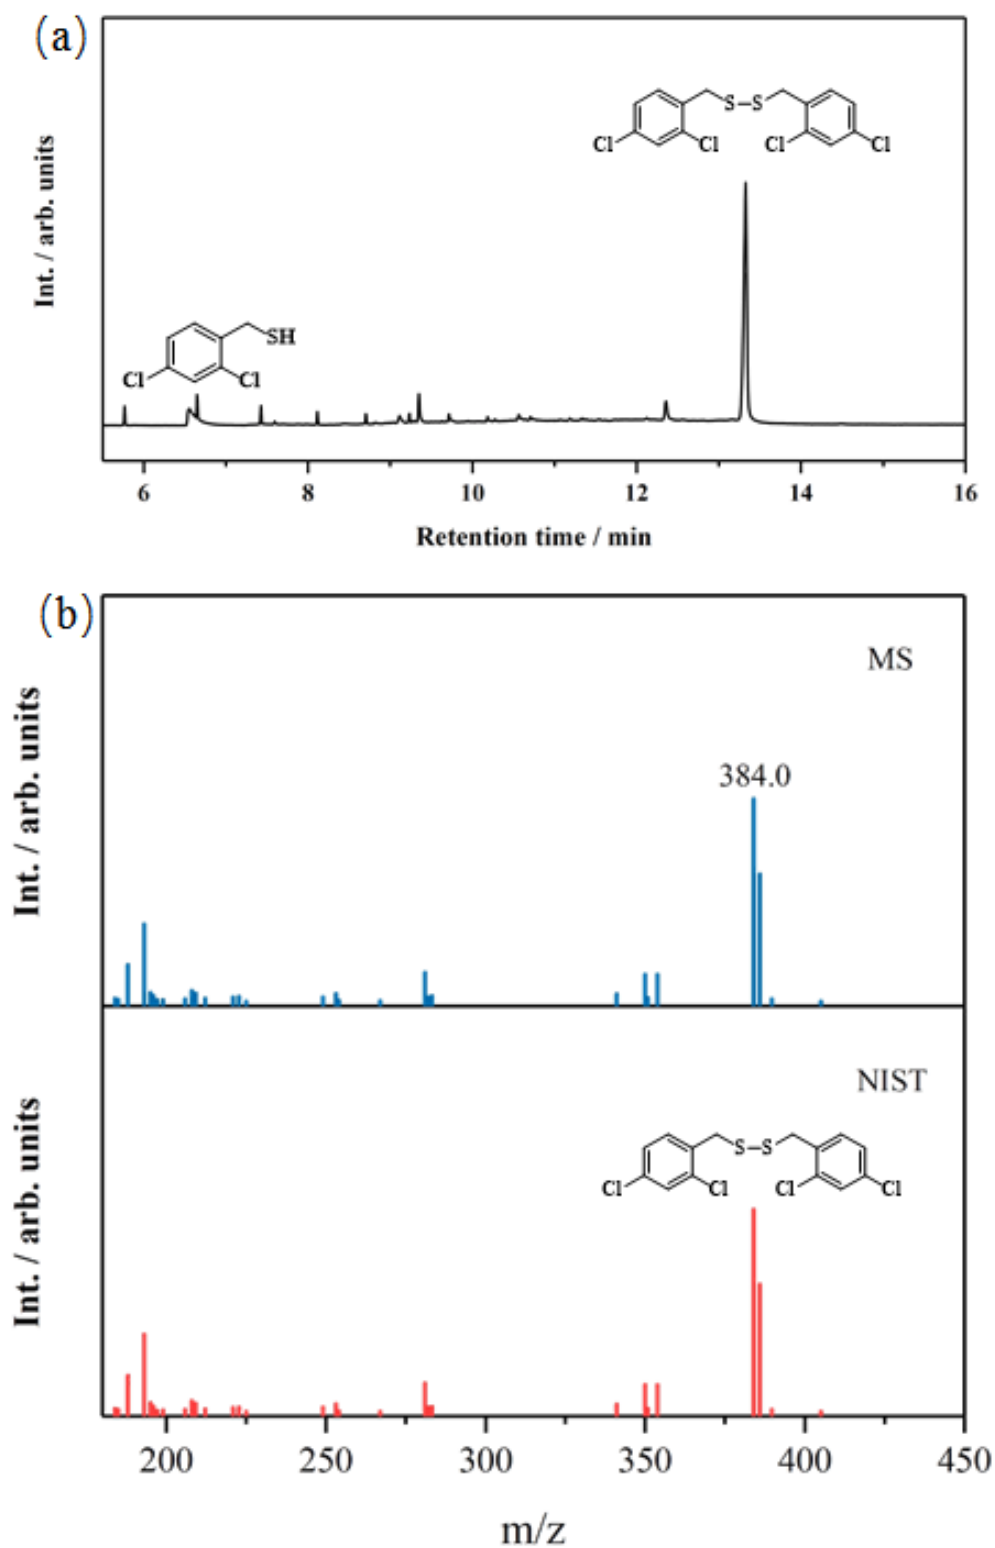

**Fig. S12.** (a) GC spectrum of 1,2-bis(2,4-dichlorobenzyl)disulfane. (b) MS spectrum from GC-MS and the NIST database (below).

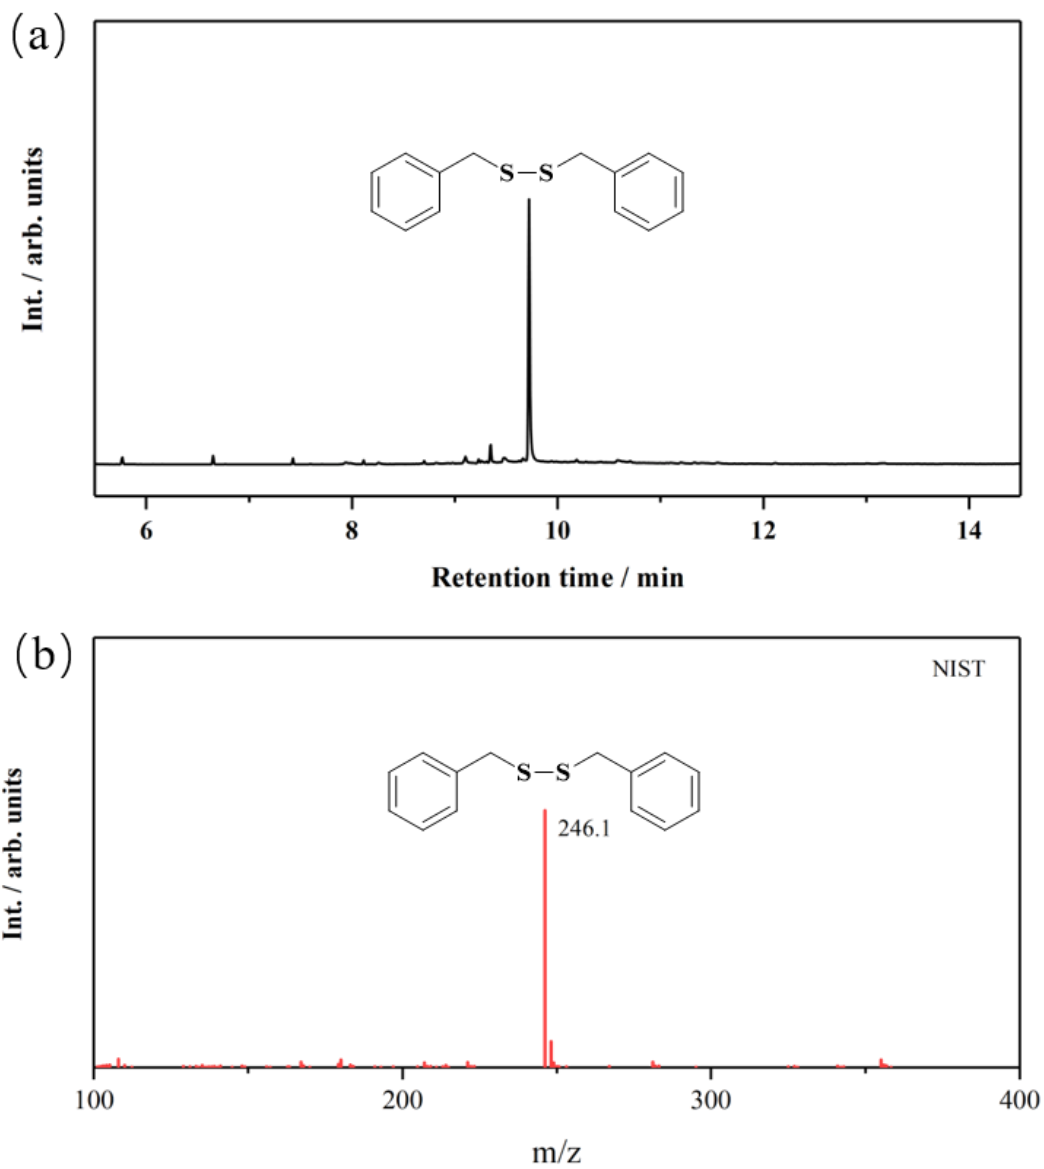

**Fig. S13.** (a) GC spectrum of 1,2-dibenzyl disulfane. (b) MS spectrum from GC-MS and the NIST database (below).

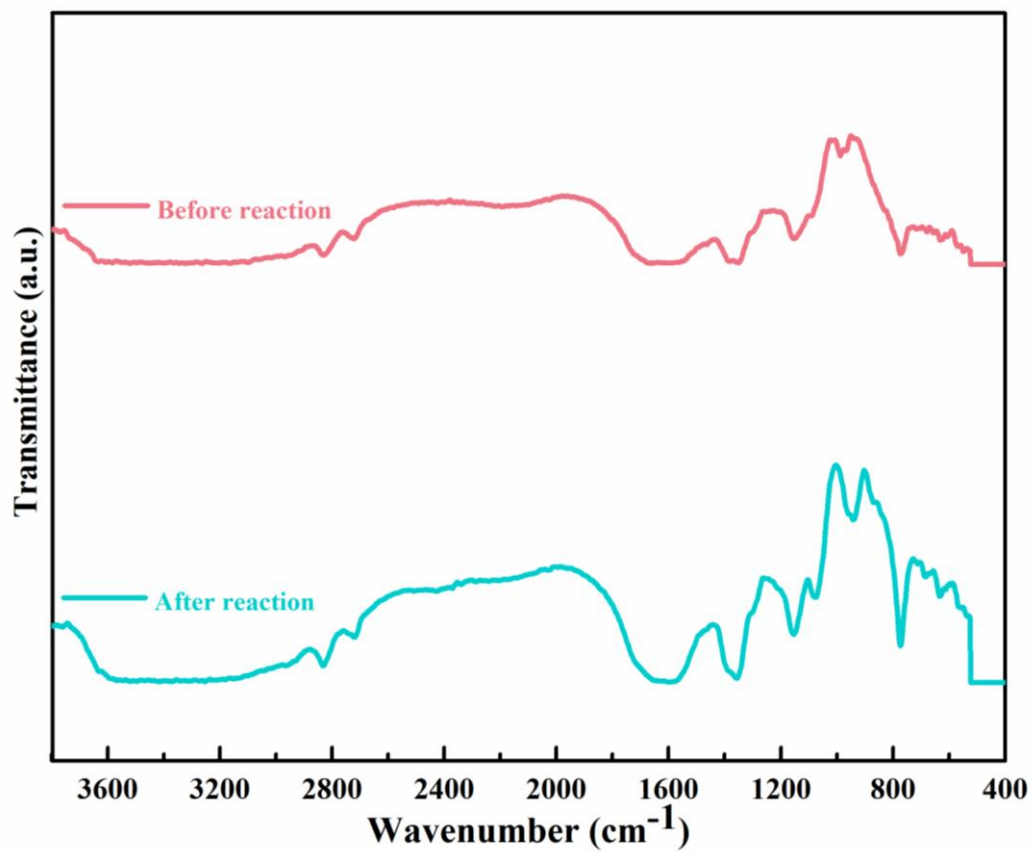

**Fig. S14.** FT-IR spectra of OBCP sample before and after the stability test.



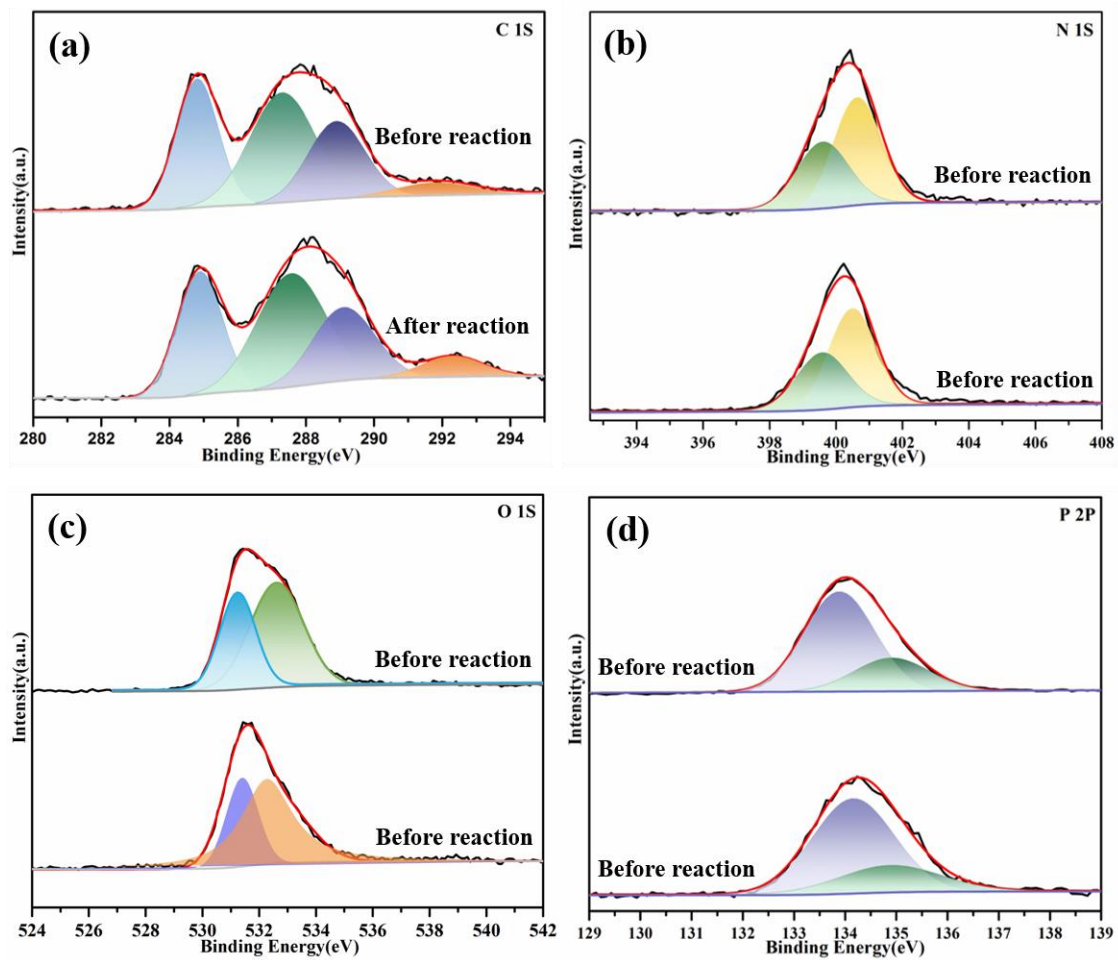

**Fig. S15.** XPS spectra of OBCP sample before and after the stability test.

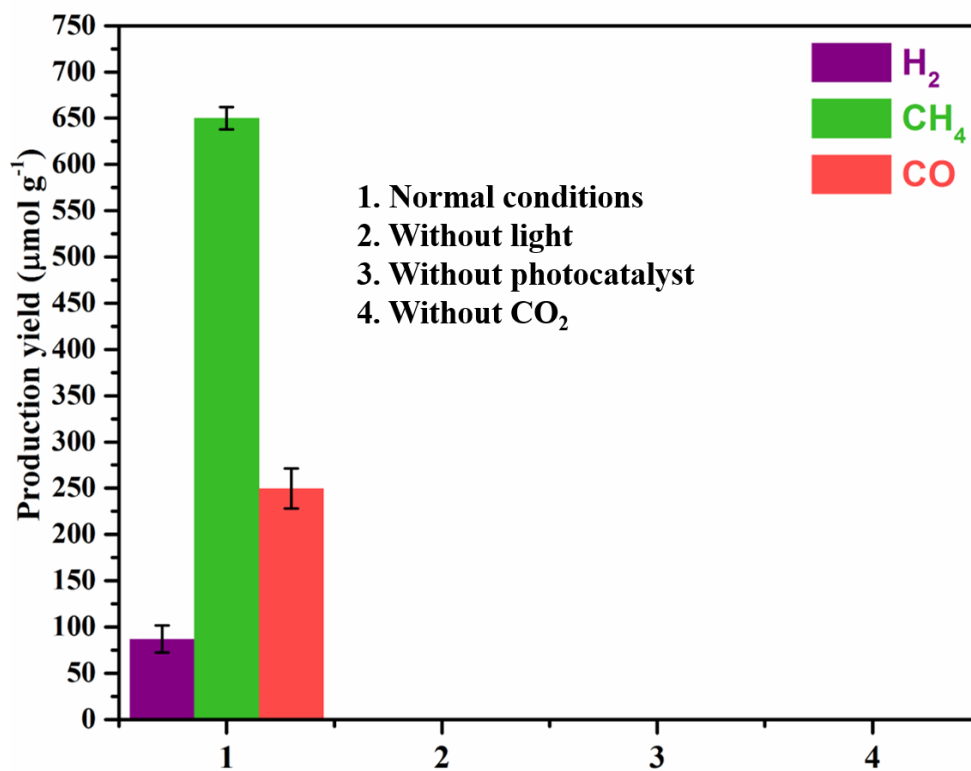

Fig. S16. Control experiments of OBCP sample.

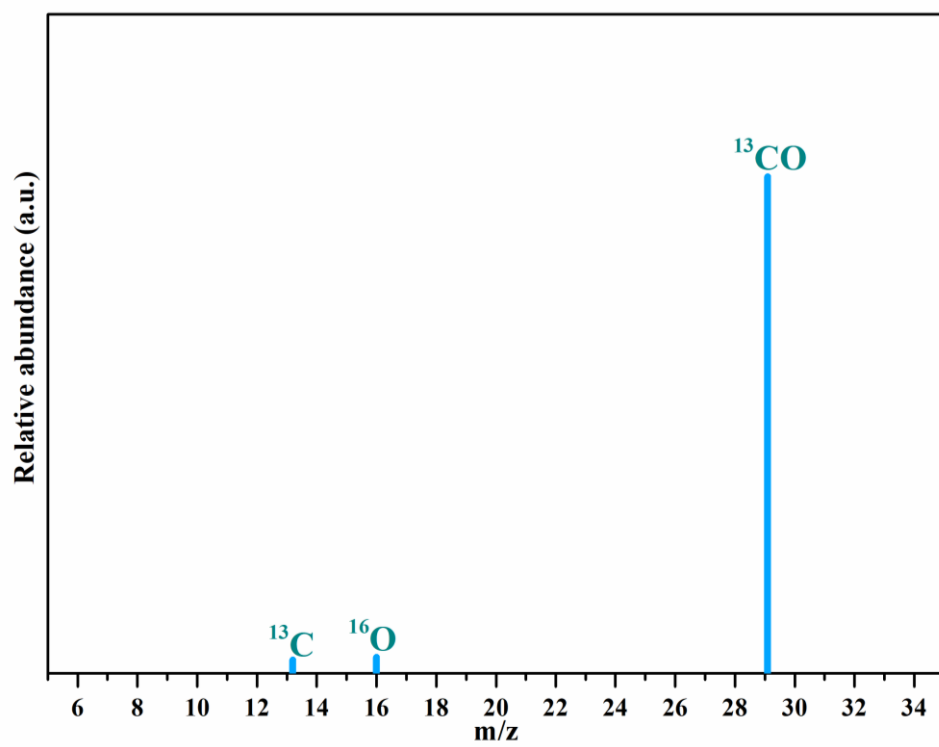

**Fig. S17.** GC-MS analysis of OBCP.

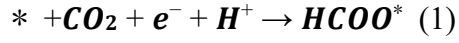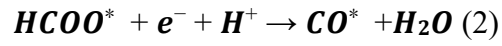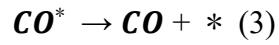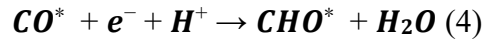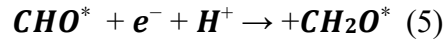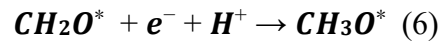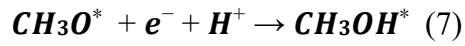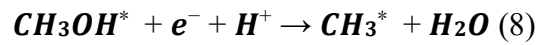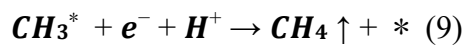

**Fig. S18.** Plausible route of photocatalytic CO<sub>2</sub> reduction.

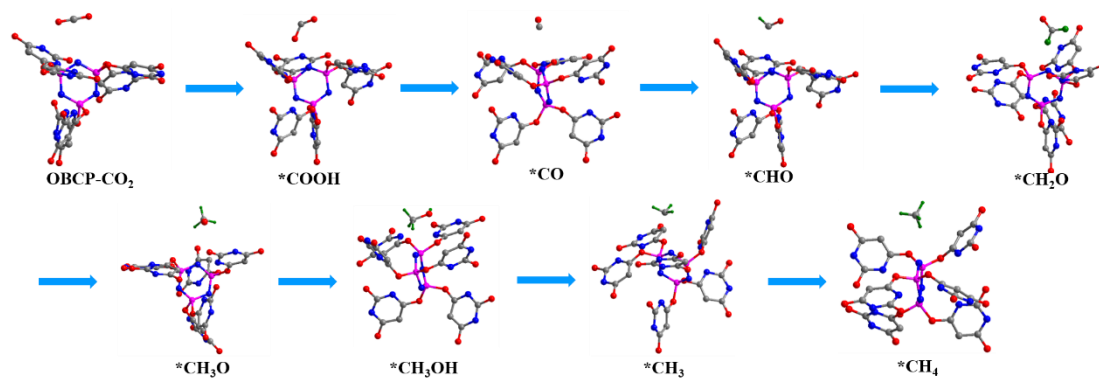

**Fig. S19.** Reaction pathways associated to photoactivation of CO<sub>2</sub> molecules at OBCP surface.

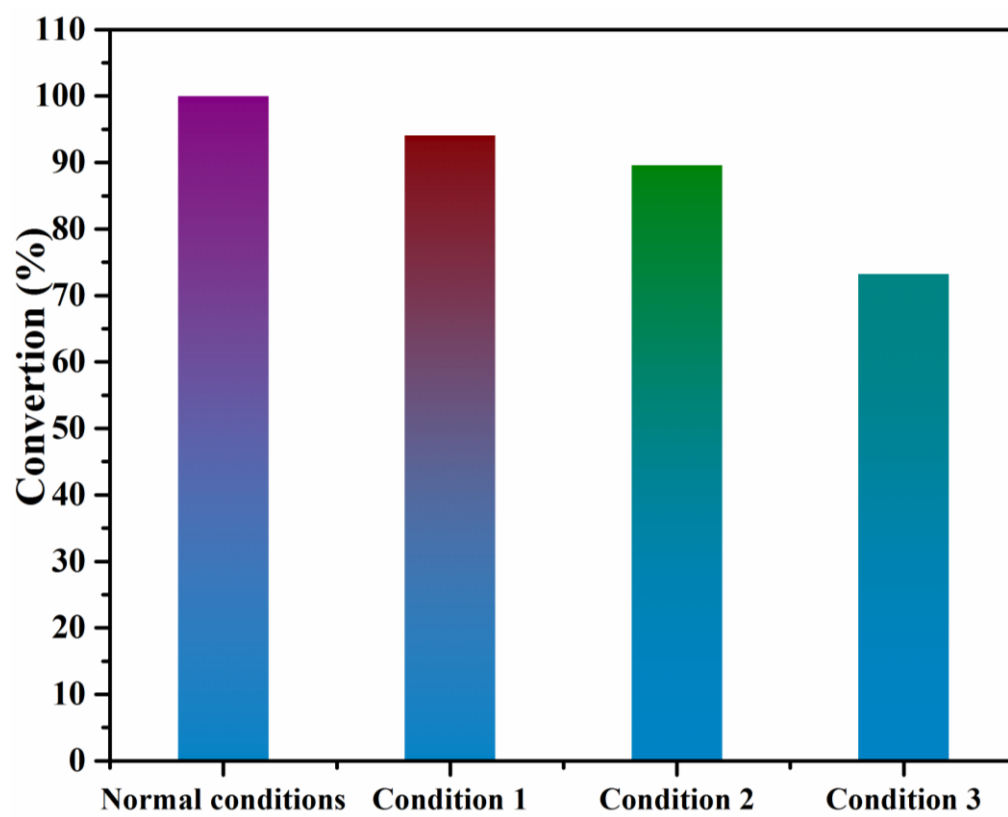

**Fig. S20.** Free radical trapping experiment of OBCP.

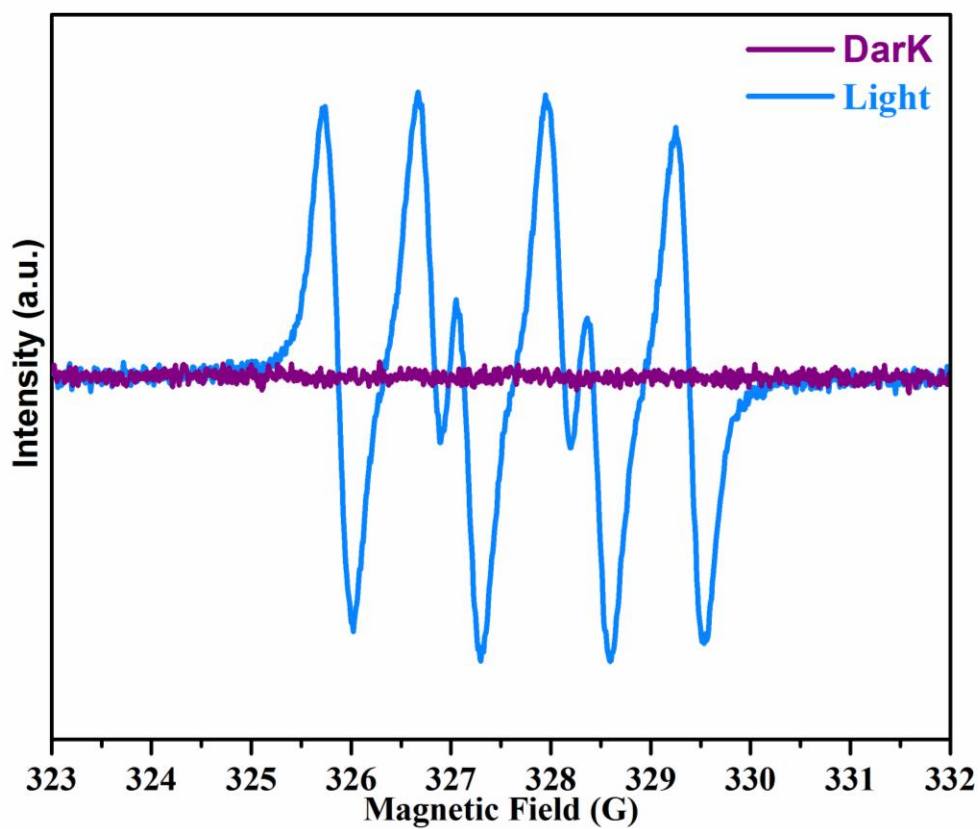

Fig. S21. EPR spectra of  $O_2^-$  in OBCP sample.

## Computational Details

All computations were performed under the framework of Density Functional Theory (DFT) using the Gaussian 16 or MS software package of programs. In our calculation, the simplest possible repetitive unit consisting of single trithiocyanuric acid and single phosphonitrile was taken into consideration. Molecular geometries were optimized using B3LYP(g) and energy was calculated using B3LYP(g,d).

DFT-optimized geometry of NBCP (singlet).

---

| Atom | x           | y           | z          |
|------|-------------|-------------|------------|
| P    | 9.74840000  | 4.81980000  | 3.13560000 |
| N    | 10.94900000 | 3.77270000  | 3.00150000 |
| P    | 12.48840000 | 4.23310000  | 2.88680000 |
| N    | 12.78660000 | 5.79850000  | 3.03790000 |
| P    | 11.62530000 | 6.87980000  | 3.06170000 |
| N    | 10.10750000 | 6.39080000  | 3.04030000 |
| N    | 13.17080000 | 3.77400000  | 1.50430000 |
| N    | 13.35020000 | 3.34470000  | 3.92920000 |
| P    | 9.47940000  | 13.32820000 | 3.03060000 |
| N    | 10.72660000 | 12.32560000 | 3.19730000 |
| P    | 12.22570000 | 12.86860000 | 3.18810000 |
| N    | 12.48300000 | 14.43370000 | 3.24070000 |
| P    | 11.26560000 | 15.47640000 | 3.13550000 |
| N    | 9.76820000  | 14.89340000 | 3.22610000 |
| O    | 13.06980000 | 12.31520000 | 1.87900000 |
| O    | 13.06790000 | 12.25750000 | 4.46990000 |
| C    | 13.35620000 | 10.98410000 | 1.66600000 |
| C    | 13.36050000 | 10.92140000 | 4.63290000 |
| N    | 12.33840000 | 10.12450000 | 1.59890000 |
| C    | 12.74100000 | 8.84740000  | 1.62620000 |
| N    | 13.99490000 | 8.39750000  | 1.60540000 |
| C    | 14.90230000 | 9.38070000  | 1.66190000 |
| N    | 14.66180000 | 10.69370000 | 1.64340000 |
| N    | 12.34830000 | 10.05110000 | 4.63730000 |
| C    | 12.76090000 | 8.77750000  | 4.58460000 |
| N    | 14.01790000 | 8.33640000  | 4.61710000 |
| C    | 14.91610000 | 9.32960000  | 4.61870000 |
| N    | 14.66780000 | 10.64000000 | 4.68700000 |
| O    | 11.75390000 | 7.85970000  | 4.38330000 |
| N    | 16.22020000 | 8.93080000  | 4.43470000 |
| O    | 11.72250000 | 7.93580000  | 1.79340000 |
| N    | 16.19630000 | 8.95620000  | 1.84990000 |



|   |             |             |            |
|---|-------------|-------------|------------|
| P | 17.13280000 | 9.39780000  | 3.13710000 |
| N | 18.37750000 | 8.41520000  | 3.13510000 |
| P | 19.87840000 | 8.98320000  | 3.05960000 |
| N | 20.09190000 | 10.56700000 | 3.25540000 |
| P | 18.86560000 | 11.59010000 | 3.11120000 |
| N | 17.38180000 | 10.97090000 | 3.17180000 |
| O | 20.47990000 | 8.42370000  | 1.67550000 |
| O | 20.84310000 | 8.23650000  | 4.12170000 |
| O | 18.92350000 | 12.75060000 | 4.23880000 |
| O | 19.14090000 | 12.43100000 | 1.76470000 |
| O | 8.73570000  | 13.18250000 | 1.60800000 |
| O | 8.33370000  | 12.80760000 | 4.04880000 |
| O | 8.99440000  | 4.43800000  | 4.50910000 |
| H | 18.20860000 | 12.58900000 | 4.89360000 |
| H | 20.85290000 | 8.73260000  | 4.96900000 |
| H | 21.40560000 | 8.73070000  | 1.55300000 |
| H | 8.76090000  | 12.29390000 | 4.76950000 |
| H | 8.54870000  | 12.23670000 | 1.41240000 |
| H | 18.43890000 | 13.10690000 | 1.62870000 |
| H | 13.19310000 | 2.79400000  | 1.43420000 |
| H | 12.85590000 | 3.23940000  | 4.77150000 |
| H | 8.17970000  | 4.97720000  | 4.61840000 |
| O | 8.55250000  | 4.54690000  | 2.07650000 |
| H | 8.70050000  | 5.07940000  | 1.26420000 |
| N | 11.54430000 | 16.32350000 | 1.79480000 |
| H | 10.84680000 | 17.00460000 | 1.66760000 |
| N | 11.38860000 | 16.64500000 | 4.24860000 |
| H | 10.88920000 | 16.38930000 | 5.05450000 |
| H | 12.33950000 | 16.81610000 | 1.19730000 |
| H | 12.13740000 | 17.44650000 | 4.07790000 |
| H | 14.38870000 | 3.17350000  | 3.57660000 |
| H | 14.07080000 | 4.12360000  | 0.95660000 |
| H | 16.88180000 | 8.39980000  | 5.15060000 |
| H | 16.90660000 | 8.68140000  | 1.04240000 |

-----

DFT-optimized geometry of OBCP (singlet).

-----

| Atom | x           | y          | z          |
|------|-------------|------------|------------|
| P    | 9.74620000  | 4.82110000 | 3.13530000 |
| N    | 10.94600000 | 3.77290000 | 3.00530000 |

|   |             |             |            |
|---|-------------|-------------|------------|
| P | 12.48580000 | 4.23160000  | 2.89080000 |
| N | 12.78540000 | 5.79700000  | 3.03970000 |
| P | 11.62500000 | 6.87890000  | 3.06090000 |
| N | 10.10710000 | 6.39180000  | 3.03810000 |
| O | 13.16840000 | 3.76980000  | 1.50940000 |
| O | 13.34630000 | 3.34390000  | 3.93480000 |
| P | 9.48050000  | 13.32680000 | 3.03360000 |
| N | 10.72840000 | 12.32440000 | 3.19750000 |
| P | 12.22700000 | 12.86810000 | 3.18780000 |
| N | 12.48410000 | 14.43290000 | 3.23960000 |
| P | 11.26620000 | 15.47540000 | 3.13700000 |
| N | 9.76930000  | 14.89180000 | 3.22930000 |
| O | 13.07170000 | 12.31390000 | 1.87930000 |
| O | 13.06980000 | 12.25770000 | 4.46990000 |
| C | 13.35800000 | 10.98330000 | 1.66650000 |
| C | 13.36170000 | 10.92200000 | 4.63380000 |
| N | 12.34020000 | 10.12330000 | 1.60020000 |
| C | 12.74290000 | 8.84580000  | 1.62590000 |
| N | 13.99700000 | 8.39640000  | 1.60250000 |
| C | 14.90480000 | 9.37980000  | 1.65400000 |
| N | 14.66370000 | 10.69280000 | 1.63720000 |
| N | 12.34910000 | 10.05190000 | 4.63770000 |
| C | 12.76030000 | 8.77770000  | 4.58180000 |
| N | 14.01740000 | 8.33570000  | 4.61220000 |
| C | 14.91660000 | 9.32830000  | 4.60980000 |
| N | 14.66890000 | 10.63900000 | 4.68190000 |
| O | 11.75280000 | 7.86110000  | 4.38150000 |
| O | 16.21960000 | 8.92840000  | 4.42530000 |
| O | 11.72490000 | 7.93390000  | 1.79190000 |
| O | 16.19910000 | 8.95650000  | 1.84100000 |
| P | 17.13420000 | 9.39790000  | 3.12950000 |
| N | 18.37930000 | 8.41640000  | 3.12820000 |
| P | 19.88010000 | 8.98590000  | 3.06080000 |
| N | 20.09100000 | 10.56960000 | 3.25890000 |
| P | 18.86470000 | 11.59170000 | 3.11050000 |
| N | 17.38120000 | 10.97100000 | 3.16500000 |
| O | 20.48900000 | 8.42830000  | 1.67920000 |
| O | 20.84000000 | 8.23910000  | 4.12700000 |
| O | 18.91760000 | 12.75160000 | 4.23880000 |
| O | 19.14400000 | 12.43340000 | 1.76550000 |
| O | 8.73440000  | 13.18130000 | 1.61240000 |
| O | 8.33670000  | 12.80560000 | 4.05350000 |
| O | 8.98920000  | 4.44250000  | 4.50800000 |
| H | 18.19980000 | 12.58970000 | 4.89150000 |

|   |             |             |            |
|---|-------------|-------------|------------|
| H | 20.84610000 | 8.73510000  | 4.97520000 |
| H | 21.41580000 | 8.73610000  | 1.56140000 |
| H | 8.76480000  | 12.29070000 | 4.77380000 |
| H | 8.54540000  | 12.23520000 | 1.41710000 |
| H | 18.44210000 | 13.10970000 | 1.62680000 |
| H | 13.19020000 | 2.78900000  | 1.44010000 |
| H | 12.85150000 | 3.23990000  | 4.77770000 |
| H | 8.17310000  | 4.98140000  | 4.61440000 |
| O | 8.55210000  | 4.54760000  | 2.07450000 |
| H | 8.70110000  | 5.07980000  | 1.26140000 |
| O | 11.54270000 | 16.32360000 | 1.79660000 |
| H | 10.84490000 | 17.00550000 | 1.67050000 |
| O | 11.39060000 | 16.64310000 | 4.25080000 |
| H | 10.89170000 | 16.38720000 | 5.05770000 |

-----

DFT-optimized geometry of SBCP (singlet).

-----

| Atom | x           | y           | z          |
|------|-------------|-------------|------------|
| P    | 9.46270000  | 4.78450000  | 3.11350000 |
| N    | 10.61710000 | 3.67480000  | 3.05020000 |
| P    | 12.18000000 | 4.07440000  | 2.99350000 |
| N    | 12.54890000 | 5.64350000  | 3.07400000 |
| P    | 11.42570000 | 6.76930000  | 3.04360000 |
| N    | 9.89360000  | 6.33530000  | 3.00170000 |
| S    | 13.14320000 | 3.42300000  | 1.23310000 |
| S    | 13.19540000 | 2.95130000  | 4.46210000 |
| P    | 9.75330000  | 13.43000000 | 3.04910000 |
| N    | 10.90860000 | 12.31620000 | 3.15640000 |
| P    | 12.45070000 | 12.71070000 | 3.14520000 |
| N    | 12.85520000 | 14.25000000 | 3.16270000 |
| P    | 11.72400000 | 15.41080000 | 3.16400000 |
| N    | 10.17940000 | 14.96220000 | 3.28110000 |
| O    | 13.25150000 | 12.07350000 | 1.85080000 |
| O    | 13.24470000 | 12.05130000 | 4.43160000 |
| C    | 13.42480000 | 10.72630000 | 1.61090000 |
| C    | 13.42300000 | 10.69690000 | 4.61640000 |
| N    | 12.34850000 | 9.93620000  | 1.62970000 |
| C    | 12.66520000 | 8.63410000  | 1.57220000 |
| N    | 13.87250000 | 8.10640000  | 1.40460000 |
| C    | 14.86260000 | 9.02510000  | 1.34850000 |
| N    | 14.69240000 | 10.35780000 | 1.41940000 |

|   |             |             |            |
|---|-------------|-------------|------------|
| N | 12.33960000 | 9.91720000  | 4.59710000 |
| C | 12.64880000 | 8.61320000  | 4.55020000 |
| N | 13.85860000 | 8.07150000  | 4.63420000 |
| C | 14.85630000 | 8.97690000  | 4.73470000 |
| N | 14.69460000 | 10.31480000 | 4.75230000 |
| O | 11.56880000 | 7.78280000  | 4.33350000 |
| S | 16.50940000 | 8.30000000  | 4.75060000 |
| O | 11.59560000 | 7.78050000  | 1.75330000 |
| S | 16.52170000 | 8.36380000  | 1.27590000 |
| P | 17.41980000 | 9.25180000  | 3.03250000 |
| N | 18.91280000 | 8.65250000  | 3.05630000 |
| P | 20.18380000 | 9.64080000  | 3.06850000 |
| N | 19.91830000 | 11.20920000 | 3.30890000 |
| P | 18.46190000 | 11.85130000 | 3.11340000 |
| N | 17.21330000 | 10.83720000 | 3.06880000 |
| O | 20.97810000 | 9.32090000  | 1.70340000 |
| O | 21.28280000 | 9.18090000  | 4.16470000 |
| O | 18.12660000 | 12.92930000 | 4.27180000 |
| O | 18.55970000 | 12.77760000 | 1.79960000 |
| O | 8.96940000  | 13.39420000 | 1.64220000 |
| O | 8.59000000  | 12.98770000 | 4.08180000 |
| O | 8.64200000  | 4.46600000  | 4.46300000 |
| H | 17.40300000 | 12.56720000 | 4.83380000 |
| H | 21.13990000 | 9.67710000  | 5.00120000 |
| H | 21.79370000 | 9.86830000  | 1.64090000 |
| H | 8.98310000  | 12.41800000 | 4.78100000 |
| H | 8.66450000  | 12.48090000 | 1.43620000 |
| H | 17.69610000 | 13.21550000 | 1.61850000 |
| H | 12.68940000 | 2.14560000  | 1.37850000 |
| H | 12.16180000 | 3.07010000  | 5.34430000 |
| H | 7.84240000  | 5.03570000  | 4.52920000 |
| O | 8.30110000  | 4.53930000  | 2.01180000 |
| H | 8.49460000  | 5.06000000  | 1.20040000 |
| S | 12.19030000 | 16.51470000 | 1.42510000 |
| H | 11.13530000 | 17.35910000 | 1.60630000 |
| S | 12.06990000 | 16.85240000 | 4.66340000 |
| H | 11.27720000 | 16.19400000 | 5.55710000 |

---
